# Supplementary material for: Whole-genome sequencing of genotype VI Newcastle disease viruses from formalin-fixed paraffin-embedded tissues from wild pigeons reveals continuous evolution and previously unrecognized genetic diversity in the U.S.
Source: Springer Nature journal article supplement (doi:10.1186/s12985-017-0914-2), 2018-01-12
Supplement: MOESM1 [file 15361980]

**Table S1** Dataset used in the complete fusion gene coding sequences phylogenetic analysis.

| <b>Genotype</b> | <b>Accession Number</b> | <b>Host</b> | <b>Country</b> | <b>Isolate</b> | <b>Year</b> |
|-----------------|-------------------------|-------------|----------------|----------------|-------------|
| II              | AF077761                | chicken     | USA            | Lasota         | 1946        |
| VIa             | EU477189                | pigeon      | USA (RI)       | RI166          | 2000        |
| VIa             | JN872160                | pigeon      | USA (MN)       | 511296         | 2007        |
| VIa             | JN872167                | dove        | USA (FL)       | 455682-2       | 2006        |
| VIa             | JN872175                | pigeon      | USA (MN)       | 723            | 2009        |
| VIa             | JN872176                | pheasant    | USA (MA)       | 359425         | 2005        |
| VIa             | JN872177                | chicken     | USA (MA)       | 344783-3       | 2004        |
| VIa             | JN872190                | pigeon      | USA (SD)       | 486839         | 2007        |
| VIa             | JN942000                | dove        | USA (FL)       | 1287           | 2008        |
| VIa             | JN942100                | chukar      | USA (NJ)       | 32429-5        | 2000        |
| VIa             | JX901320                | pigeon      | USA (PA)       | 0502           | 2005        |
| VIa             | JX901321                | chicken     | USA (PA)       | 0503           | 2005        |
| VIa             | JX901324                | pigeon      | USA (PA)       | 0602           | 2006        |
| VIa             | JX901325                | pigeon      | USA (NY)       | 0603           | 2006        |
| VIa             | JX901326                | pigeon      | USA (NJ)       | 0604           | 2006        |
| VIa             | JX901329                | pigeon      | USA (PA)       | 0701           | 2007        |
| VIa             | JX901332                | pigeon      | USA (MO)       | 0703           | 2007        |
| VIa             | JX901336                | pigeon      | USA (NC)       | 0707           | 2007        |
| VIa             | JX901337                | pigeon      | USA (CT)       | 0708           | 2007        |
| VIa             | JX901338                | pigeon      | USA (OH)       | 0709           | 2007        |
| VIa             | JX901344                | pigeon      | USA (ME)       | 0714           | 2007        |
| VIa             | JX901347                | pigeon      | USA (NY)       | 0717           | 2007        |
| VIa             | JX901356                | pigeon      | USA (PA)       | 0727           | 2007        |
| VIa             | JX901367                | pigeon      | USA (PA)       | 0810           | 2008        |
| VIa             | JX901369                | pigeon      | USA (NJ)       | 0812           | 2008        |
| VIa             | JX901374                | pigeon      | USA (OH)       | 0903           | 2009        |
| VIa             | JX901376                | pigeon      | USA(PA)        | 0905           | 2009        |
| VIa             | KP780870                | ROPI        | USA(MD)        | ND0002270      | 2013        |
| VIa             | KP780871                | ROPI        | USA(PA)        | ND0007190      | 2013        |
| VIa             | KP780875                | ROPI        | USA(MI)        | ND0003553      | 2013        |
| VIa             | KU059752                | ECDO        | USA(TX)        | TX3988         | 2004        |
| VIa             | 24998-1G                | ROPI        | USA (MA)       | 1188-1         | 2014        |
| VIa             | 22919-1-B               | ECDO        | USA (MT)       | 1177-1         | 2010        |
| VIa             | 22919-1-B               | ECDO        | USA (MT)       | 1177-2         | 2010        |
| VIa             | 22919-1-B               | ECDO        | USA (MT)       | 1177-3         | 2010        |
| VIa             | 24998-1-B               | ROPI        | USA (MA)       | 1188-3         | 2014        |
| VIa             | 23844-3-C               | ROPI        | USA (PA)       | 1189-1         | 2012        |
| VIj             | HE972209                | pigeon      | Germany        | 119            | 2006        |
| VIj             | JN872166                | dove        | Italy          | VIR_24         | 2008        |

|     |           |        |          |          |      |
|-----|-----------|--------|----------|----------|------|
| VIj | JN941997  | pigeon | USA(FL)  | 2181-43  | 2008 |
| VIj | JX244800  | pigeon | China    | 106      | 2008 |
| VIj | JX901109  | pigeon | Belgium  | 238      | 1998 |
| VIj | JX901119  | pigeon | Belgium  | 1824     | 2005 |
| VIj | KJ525674  | pigeon | China    | SXP1     | 2013 |
| VIk | JQ993431  | pigeon | China    | SDS      | 2011 |
| VIk | JX901122  | pigeon | Belgium  | 11-07574 | 2011 |
| VIk | KM374058  | pigeon | China    | 2369     | 2012 |
| VIk | KM374060  | pigeon | China    | 215      | 2011 |
| VIn | EU477190  | pigeon | USA (TX) | TX3503   | 2004 |
| VIn | EU477195  | ECDO   | USA (TX) | TX6295   | 2006 |
| VIn | JN872170  | pigeon | USA (TX) | 5254-12  | 2010 |
| VIn | JN872178  | turkey | USA (LA) | 331309   | 2004 |
| VIn | JN872179  | pigeon | USA (NV) | 241851   | 2003 |
| VIn | JX901342  | pigeon | USA (MN) | 713      | 2007 |
| VIn | KU059751  | pigeon | USA(RI)  | RI166    | 2000 |
| VIn | 26041-3-C | ECDO   | USA (TX) | 1179-1   | 2014 |
| VIn | 26041-4-C | ECDO   | USA (TX) | 1180-1   | 2014 |
| VIn | 26041-4-C | ECDO   | USA (TX) | 1180-2   | 2014 |
| VIn | 26594-1-A | ECDO   | USA (UT) | 1181-3   | 2015 |
| VIn | 26877-2-C | ECDO   | USA (TX) | 1182-3   | 2016 |
| VIn | 26981-2-C | ECDO   | USA (TX) | 1184-1   | 2015 |
| VIn | 26981-3-A | ECDO   | USA (TX) | 1185-K   | 2015 |
| VIn | W16-453-3 | ECDO   | USA (KS) | 1191-3   | 2016 |
| VIn | W16-454-2 | ECDO   | USA (KS) | 1192-1   | 2016 |
| VIn | W16-456-2 | ECDO   | USA (KS) | 1194-1   | 2016 |
| VIn | W16-457-2 | ECDO   | USA (KS) | 1195-1   | 2016 |
| VIn | 26041-4-C | ECDO   | USA (TX) | 1180-3   | 2014 |
| VIn | W16-455-2 | ECDO   | USA (KS) | 1193-1   | 2016 |
| VIn | W16-453-3 | ECDO   | USA (KS) | 1191-1   | 2016 |
| VIn | 26877-2-C | ECDO   | USA (TX) | 1182-1   | 2016 |
| VIn | 26594-1-D | ECDO   | USA (UT) | 1181-2   | 2015 |
| VIn | 26594-1-D | ECDO   | USA (UT) | 1181-1   | 2015 |

**Table S2** Dataset used in the complete genome concatenated coding sequences phylogenetic analysis.

| <b>Genotype</b> | <b>Accession Number</b> | <b>Host</b> | <b>Country</b> | <b>Isolate</b> | <b>Year</b> |
|-----------------|-------------------------|-------------|----------------|----------------|-------------|
| II              | AF077761                | chicken     | USA            | Lasota         | 1946        |
| VIa             | KC013032.1              | pigeon      | USA            | 106            | 2001        |
| VIa             | KC013033.1              | pigeon      | USA(NJ)        | 607            | 2006        |
| VIa             | KC013034.1              | pigeon      | USA(PA)        | 704            | 2007        |
| VIa             | KC013035.1              | pigeon      | USA(NY)        | 717            | 2007        |
| VIa             | KC013036.1              | pigeon      | USA(MD)        | 719            | 2007        |
| VIa             | KC013039.1              | pigeon      | USA(PA)        | 725            | 2007        |
| VIa             | KC013037.1              | pigeon      | USA(PA)        | 805            | 2008        |
| VIa             | KC013038.1              | pigeon      | USA(PA)        | 810            | 2008        |
| VIa             | KU059752.1              | ECDO        | USA(TX)        | TX3988         | 2004        |
| VIa             | 24998-1G                | ROPI        | USA (MA)       | 1188-1         | 2014        |
| VIa             | 22919-1-B               | ECDO        | USA (MT)       | 1177-1         | 2010        |
| VIa             | 22919-1-B               | ECDO        | USA (MT)       | 1177-2         | 2010        |
| VIa             | 22919-1-B               | ECDO        | USA (MT)       | 1177-3         | 2010        |
| VIa             | 24998-1-B               | ROPI        | USA (MA)       | 1188-3         | 2014        |
| VIa             | 23844-3-C               | ROPI        | USA (PA)       | 1189-1         | 2012        |
| VIj             | JX901119.1              | pigeon      | Belgium        | 05-01824       | 2005        |
| VIj             | JX901109.1              | pigeon      | Belgium        | 98-238         | 1998        |
| VIj             | FJ766526.1              | pigeon      | china          | JS-22          | 2007        |
| VIj             | KX247376.1              | pigeon      | China          | SX-01          | 2015        |
| VIk             | JX901122.1              | pigeon      | Belgium        | 11-07574       | 2011        |
| VIk             | KM374058.1              | pigeon      | China          | 2369           | 2012        |
| VIk             | JQ993431.1              | pigeon      | China          | SDS            | 2011        |
| VIk             | KM374060.1              | pigeon      | China          | 215            | 2011        |
| VIn             | KU059751.1              | pigeon      | USA(RI)        | RI166          | 2000        |
| VIn             | 26041-3-C               | ECDO        | USA (TX)       | 1179-1         | 2014        |
| VIn             | 26041-4-C               | ECDO        | USA (TX)       | 1180-1         | 2014        |
| VIn             | 26041-4-C               | ECDO        | USA (TX)       | 1180-2         | 2014        |
| VIn             | 26594-1-A               | ECDO        | USA (UT)       | 1181-3         | 2015        |
| VIn             | 26877-2-C               | ECDO        | USA (TX)       | 1182-3         | 2016        |
| VIn             | 26981-2-C               | ECDO        | USA (TX)       | 1184-1         | 2015        |
| VIn             | 26981-3-A               | ECDO        | USA (TX)       | 1185-K         | 2015        |
| VIn             | W16-453-3               | ECDO        | USA (KS)       | 1191-3         | 2016        |

|     |           |      |          |        |      |
|-----|-----------|------|----------|--------|------|
| VIn | W16-454-2 | ECDO | USA (KS) | 1192-1 | 2016 |
| VIn | W16-456-2 | ECDO | USA (KS) | 1194-1 | 2016 |
| VIn | W16-457-2 | ECDO | USA (KS) | 1195-1 | 2016 |
| VIn | 26041-4-C | ECDO | USA (TX) | 1180-3 | 2014 |
| VIn | W16-455-2 | ECDO | USA (KS) | 1193-1 | 2016 |
| VIn | W16-453-3 | ECDO | USA (KS) | 1191-1 | 2016 |
| VIn | 26877-2-C | ECDO | USA (TX) | 1182-1 | 2016 |
| VIn | 26594-1-D | ECDO | USA (UT) | 1181-2 | 2015 |
| VIn | 26594-1-D | ECDO | USA (UT) | 1181-1 | 2015 |

**Table S3** Dataset used in the partial fusion gene (374 nucleotides) phylogenetic analysis.

| <b>Accession Number</b> | <b>Host</b> | <b>Country</b> | <b>Year</b> |
|-------------------------|-------------|----------------|-------------|
| EU477196.1              | ECDO        | USA (TX)       | 2007        |
| EU477189                | pigeon      | USA (RI)       | 2000        |
| JN872178.1              | pigeon      | USA (LA)       | 2004        |
| EU477197.1              | ECDO        | USA (TX)       | 2007        |
| EU477193.1              | ECDO        | USA (TX)       | 2003        |
| EU477191.1              | ECDO        | USA (TX)       | 2004        |
| EU477190.1              | pigeon      | USA (TX)       | 2004        |
| EU477195.2              | ECDO        | USA (TX)       | 2006        |
| EU477192.1              | ECDO        | USA (TX)       | 2005        |
| EU477188.1              | dove        | USA (TX)       | 2004        |
| JN872170.1              | pigeon      | USA (TX)       | 2010        |
| KJ473708.1              | ECDO        | USA (AZ)       | 2009        |
| AY471768.1              | pigeon      | Ireland        | 1996        |
| JN872183.1              | pigeon      | USA (MD)       | 1998        |
| JN872179.1              | pigeon      | USA (NV)       | 2003        |
| JN872167.1              | dove        | USA (FL)       | 2006        |
| GQ429292.1              | pigeon      | Netherlands    | 1996        |
| AY471767.1              | pigeon      | Germany        | 1994        |
| AY175753.1              | pigeon      | Germany        | 1994        |
| AB070419.1              | pigeon      | Japan          | 1995        |
| JX901342.1              | pigeon      | USA (MN)       | 2007        |
| JX901317.1              | pigeon      | USA (PA)       | 2002        |
| AY471764.1              | pigeon      | UK             | 1994        |
| AY471762.1              | pigeon      | Germany        | 1994        |
| AY471761.1              | pigeon      | Denmark        | 1993        |
| AY150140.1              | pigeon      | Germany        | 1994        |
| AY150133.1              | pigeon      | Germany        | 1993        |
| AY150132.1              | pigeon      | Spain          | 1992        |
| AB070422.1              | pigeon      | Japan          | 1996        |
| KU059752.1              | ECDO        | USA (TX)       | 2004        |
| JX901369.1              | pigeon      | USA (NJ)       | 2008        |
| JX901367.1              | pigeon      | USA (PA)       | 2008        |
| JX901360.1              | pigeon      | USA (PA)       | 2008        |
| JX901326.1              | pigeon      | USA (NJ)       | 2006        |
| JX901325.1              | pigeon      | USA (NY)       | 2006        |
| JX901324.1              | pigeon      | USA (PA)       | 2006        |
| JX901321.1              | chicken     | USA (PA)       | 2005        |
| JX901320.1              | pigeon      | USA (PA)       | 2005        |
| JX901314.1              | dove        | USA (PA)       | 2001        |
| JX901313.1              | pigeon      | USA (PA)       | 2001        |

|            |             |          |      |
|------------|-------------|----------|------|
| KC013038.1 | pigeon      | USA (PA) | 2008 |
| KC013032.1 | pigeon      | USA (PA) | 2001 |
| JN942000.1 | dove        | USA (FL) | 2008 |
| JN872176.1 | pheasant    | USA (MA) | 2005 |
| EU477189.1 | pigeon      | USA (RI) | 2000 |
| AY471759.1 | pigeon      | Austria  | 1995 |
| AY471758.1 | pigeon      | UK       | 1990 |
| AY150141.1 | chicken     | Germany  | 1994 |
| AY150139.1 | pigeon      | Hungary  | 1994 |
| JX901376.1 | pigeon      | USA (PA) | 2009 |
| JX901365.1 | pigeon      | USA (PA) | 2008 |
| JX901351.1 | pigeon      | USA (NJ) | 2007 |
| JX901340.1 | pigeon      | USA (NJ) | 2007 |
| JX901339.1 | pigeon      | USA (NJ) | 2007 |
| JX901337.1 | pigeon      | USA (CT) | 2007 |
| JX901334.1 | pigeon      | USA (PA) | 2007 |
| JX901327.1 | pigeon      | USA (PA) | 2006 |
| JX901323.1 | pigeon      | USA (PA) | 2006 |
| JX901319.1 | pigeon      | USA (PA) | 2005 |
| JX901305.1 | pigeon      | USA (PA) | 2003 |
| JX901304.1 | pigeon      | USA (PA) | 2003 |
| JN942100.1 | Chukar      | USA (NJ) | 2000 |
| JN872177.1 | chicken     | USA (MA) | 2004 |
| JN872174.1 | Environment | USA (NJ) | 2010 |
| JN872160.1 | pigeon      | USA (MN) | 2007 |
| AY471765.1 | pigeon      | France   | 1998 |
| AY471760.1 | pigeon      | Austria  | 1998 |
| AY150115.1 | pigeon      | Hungary  | 1987 |
| JX901372.1 | Broiler     | USA (PA) | 2009 |
| JX901336.1 | pigeon      | USA (NC) | 2007 |
| JN941998.1 | pigeon      | USA (PA) | 2008 |
| JN872190.1 | pigeon      | USA (SD) | 2007 |
| KJ736742.1 | pigeon      | Germany  | 1998 |
| JX901375.1 | pigeon      | USA (PA) | 2009 |
| JX901373.1 | pigeon      | USA (PA) | 2009 |
| JX901368.1 | pigeon      | USA (PA) | 2008 |
| JX901355.1 | pigeon      | USA (PA) | 2007 |
| JX901353.1 | pigeon      | USA (PA) | 2007 |
| JX901350.1 | pigeon      | USA (PA) | 2007 |
| JX901344.1 | pigeon      | USA (ME) | 2007 |
| JX901333.1 | pigeon      | USA (PA) | 2007 |
| JX901330.1 | pigeon      | USA (PA) | 2007 |
| JX901329.1 | pigeon      | USA (PA) | 2007 |

|            |          |          |      |
|------------|----------|----------|------|
| JX901328.1 | pigeon   | USA (NJ) | 2006 |
| KC013034.1 | pigeon   | USA (PA) | 2007 |
| KC013033.1 | pigeon   | USA (NJ) | 2006 |
| JN941999.1 | pigeon   | USA (MN) | 2008 |
| AY288995.1 | dove     | Italy    | 2000 |
| AY471771.1 | pigeon   | AUSAtria | 1997 |
| AY562989.1 | dove     | Italy    | 2000 |
| AY150149.1 | pigeon   | Hungary  | 1998 |
| AY175759.1 | dove     | Italy    | 2000 |
| AB070434.1 | pigeon   | Japan    | 2000 |
| KP780876.1 | pigeon   | USA (MI) | 2013 |
| KP780875.1 | pigeon   | USA (MI) | 2013 |
| KP780874.1 | pigeon   | USA (PA) | 2013 |
| KP780873.1 | pigeon   | USA (PA) | 2013 |
| KP780872.1 | pigeon   | USA (PA) | 2013 |
| KP780871.1 | pigeon   | USA (PA) | 2013 |
| KP780870.1 | pigeon   | USA (MD) | 2013 |
| KJ473709.1 | ECDO     | USA (MT) | 2009 |
| JX901366.1 | pigeon   | USA (PA) | 2008 |
| JX901364.1 | pigeon   | USA (PA) | 2008 |
| JX901363.1 | pigeon   | USA (PA) | 2008 |
| JX901352.1 | pigeon   | USA (PA) | 2007 |
| JX901349.1 | pigeon   | USA (MD) | 2007 |
| JX901346.1 | pigeon   | USA (PA) | 2007 |
| JX901332.1 | pigeon   | USA (MO) | 2007 |
| KC013036.1 | pigeon   | USA (MD) | 2007 |
| JN941996.1 | pigeon   | USA (PA) | 2008 |
| JN872175.1 | pigeon   | USA (MN) | 2009 |
| GQ429293.1 | dove     | Italy    | 2000 |
| DQ904250.1 | pigeon   | Quebec   | 2006 |
| AY471766.1 | pigeon   | UK       | 1998 |
| KJ473710.1 | ECDO     | USA (MT) | 2010 |
| JX901377.1 | pigeon   | USA (PA) | 2009 |
| JX901359.1 | pigeon   | USA (PA) | 2008 |
| JX901354.1 | pigeon   | USA (PA) | 2007 |
| KC013039.1 | pigeon   | USA (PA) | 2007 |
| JN872172.1 | Raptor   | USA (MN) | 2009 |
| AY471769.1 | pigeon   | Italy    | 1999 |
| AY150153.1 | pigeon   | Hungary  | 1999 |
| AY150130.1 | pigeon   | Hungary  | 1992 |
| AY175752.1 | cockatoo | Germany  | 1995 |
| JX901374.1 | pigeon   | USA (OH) | 2009 |
| JX901361.1 | pigeon   | USA (PA) | 2008 |

|            |            |              |      |
|------------|------------|--------------|------|
| JX901348.1 | pigeon     | USA (PA)     | 2007 |
| JX901347.1 | pigeon     | USA (NY)     | 2007 |
| JX901338.1 | pigeon     | USA (OH)     | 2007 |
| KC013035.1 | pigeon     | USA (NY)     | 2007 |
| AY471777.1 | pigeon     | Portugal     | 1999 |
| AY445669.1 | chicken    | South Africa | 2002 |
| JX901357.1 | pigeon     | USA (PA)     | 2007 |
| DQ289796.1 | pigeon     | Turkey       | 2005 |
| AY471773.1 | budgerigar | Turkey       | 1995 |
| JX901362.1 | pigeon     | USA (PA)     | 2008 |
| JX901358.1 | pigeon     | USA (PA)     | 2008 |
| JX901335.1 | pigeon     | USA (PA)     | 2007 |
| KC013037.1 | pigeon     | USA (PA)     | 2008 |
| EF030964.1 | pigeon     | South Africa | 2006 |
| EF030956.1 | dove       | South Africa | 2005 |
| EF030955.1 | dove       | South Africa | 2005 |
| EF030950.1 | pigeon     | South Africa | 2006 |
| AY471775.1 | pigeon     | Portugal     | 1999 |
| AY150164.1 | pigeon     | Hungary      | 2001 |
| AY175776.1 | chicken    | Turkey       | 1995 |
| JX901356.1 | pigeon     | USA (PA)     | 2007 |
| EF030957.1 | dove       | South Africa | 2006 |
| EF030954.1 | dove       | South Africa | 2005 |
| AY471776.1 | pigeon     | Portugal     | 1998 |
| KU527559.1 | pigeon     | China        | 2015 |
| EF030962.1 | pigeon     | South Africa | 2004 |
| EF030961.1 | dove       | South Africa | 2006 |
| EF030960.1 | dove       | South Africa | 2006 |
| EF030958.1 | dove       | South Africa | 2006 |
| AY471774.1 | pigeon     | Portugal     | 2001 |
| AY471721.1 | pigeon     | UAE          | 2000 |
| KJ782376.1 | pigeon     | China        | 2011 |
| KJ607166.1 | pigeon     | China        | 2013 |
| KC915216.1 | pigeon     | Macedonia    | 2012 |
| KC915205.1 | pigeon     | Macedonia    | 2007 |
| JX244798.1 | pigeon     | China        | 2008 |
| JX901124.1 | pigeon     | Belgium      | 2011 |
| JX901110.1 | pigeon     | Belgium      | 1998 |
| JX901109.1 | pigeon     | Belgium      | 1998 |
| JX901111.1 | pigeon     | Belgium      | 1998 |
| JF823994.1 | pigeon     | Kemerovo     | 2005 |
| JN986839.1 | pigeon     | Ireland      | 2004 |
| EF026583.2 | pigeon     | Belgium      | 1998 |



|            |         |              |      |
|------------|---------|--------------|------|
| EF026579.2 | pigeon  | Belgium      | 1998 |
| EF030963.1 | pigeon  | South Africa | 2005 |
| EF026582.1 | pigeon  | Belgium      | 1998 |
| EF026581.1 | pigeon  | Belgium      | 1998 |
| EF026580.1 | pigeon  | Belgium      | 1998 |
| AY288996.1 | pigeon  | Italy        | 2000 |
| AY471778.1 | pigeon  | Austria      | 1997 |
| AY471737.1 | pigeon  | Ireland      | 2002 |
| AY471732.1 | pigeon  | Ireland      | 2001 |
| AY471725.1 | pigeon  | UK           | 2002 |
| AY471723.1 | pigeon  | UK           | 2002 |
| AY175770.1 | pigeon  | UK           | 1999 |
| AJ306305.1 | pigeon  | France       | 2001 |
| KP861633.1 | pigeon  | China        | 2012 |
| KF828884.1 | pigeon  | China        | 2013 |
| JX901122.1 | pigeon  | Belgium      | 2011 |
| JX486552.1 | pigeon  | China        | 2011 |
| JN872162.1 | Rosella | Belgium      | 2008 |
| HM776583.1 | pigeon  | China        | 2008 |
| HM063425.1 | pigeon  | China        | 2010 |
| AY471754.1 | pigeon  | UK           | 2002 |
| AY471753.1 | pigeon  | UK           | 2001 |
| AY471747.1 | pigeon  | Belgium      | 1998 |
| AY471746.1 | pigeon  | UK           | 2000 |
| AY471745.1 | pigeon  | UAE          | 2000 |
| AY471741.1 | chicken | Italy        | 2000 |
| AY471735.1 | pigeon  | Canada       | 1991 |
| AY471730.1 | pigeon  | UK           | 2002 |
| AY471728.1 | pigeon  | UAE          | 2000 |
| AY471726.1 | pigeon  | UK           | 2000 |
| AY471724.1 | pigeon  | Ireland      | 2000 |
| AY150155.1 | pigeon  | Hungary      | 2000 |
| AY150154.1 | pigeon  | Germany      | 2000 |
| AY175756.1 | pigeon  | Ireland      | 2000 |
| AY175754.1 | pigeon  | Germany      | 1999 |
| AJ306304.1 | pigeon  | France       | 2001 |
| KY569335.1 | pigeon  | Malaysia     | 2011 |
| KX710210.1 | pigeon  | India        | 2015 |
| KU522142.1 | pigeon  | Egypt        | 2014 |
| KJ808819.1 | pigeon  | China        | 2013 |
| KJ607165.1 | pigeon  | China        | 2014 |
| HG326603.1 | pigeon  | Nigeria      | 2007 |
| KC915215.1 | pigeon  | Macedonia    | 2011 |

|            |                          |           |      |
|------------|--------------------------|-----------|------|
| KC915214.1 | pigeon                   | Macedonia | 2011 |
| KC915208.1 | pigeon                   | Macedonia | 2008 |
| KC915206.1 | pigeon                   | Macedonia | 2007 |
| JX244800.1 | pigeon                   | China     | 2008 |
| JX244799.1 | pigeon                   | China     | 2008 |
| KC143159.1 | pigeon                   | China     | 2005 |
| JX901123.1 | pigeon                   | Belgium   | 2011 |
| JX901118.1 | pigeon                   | Belgium   | 2003 |
| JQ993431.1 | pigeon                   | China     | 2011 |
| JQ039391.1 | pigeon                   | Nigeria   | 2007 |
| JQ039388.1 | pigeon                   | Nigeria   | 2008 |
| JQ039387.1 | pigeon                   | Nigeria   | 2008 |
| HM063423.1 | White-breasted water hen | China     | 2005 |
| EF364037.1 | pigeon                   | Slovakia  | 2005 |
| DQ439884.1 | pigeon                   | China     | 5    |
| AY471785.1 | Kestrel                  | UAE       | 1999 |
| AY471783.1 | Kestrel                  | UAE       | 1998 |
| AY471782.1 | pigeon                   | UAE       | 1997 |
| AY471781.1 | pigeon                   | UAE       | 1996 |
| AY471780.1 | pigeon                   | UAE       | 1999 |
| AY471752.1 | pigeon                   | UK        | 2001 |
| AY471744.1 | pigeon                   | Ireland   | 2000 |
| AY471742.1 | dove                     | Italy     | 2001 |
| AY471736.1 | pigeon                   | UK        | 2001 |
| AY471727.1 | pigeon                   | UK        | 2002 |
| AY471722.1 | pigeon                   | Ireland   | 2000 |
| AY150099.1 | pigeon                   | Hungary   | 1983 |
| AY175771.1 | pigeon                   | UK        | 1999 |
| AY175751.1 | pigeon                   | UAE       | 1996 |
| KX710209.1 | pigeon                   | India     | 2015 |
| KU377530.1 | turtledove               | Italy     | 2004 |
| KU527560.1 | pigeon                   | China     | 2015 |
| KM374061.1 | pigeon                   | Zhejiang  | 2012 |
| KJ808820.1 | pigeon                   | China     | 2012 |
| HG326602.1 | pigeon                   | Nigeria   | 2007 |
| HG326601.1 | pigeon                   | Nigeria   | 2007 |
| KC915212.1 | pigeon                   | Macedonia | 2010 |
| JX244805.1 | pigeon                   | China     | 2008 |
| JX244801.1 | pigeon                   | China     | 2008 |
| JX244794.1 | pigeon                   | China     | 2008 |
| KC143164.1 | pigeon                   | China     | 2011 |
| JX901119.1 | pigeon                   | Belgium   | 2005 |
| JQ979176.1 | pigeon                   | China     | 2011 |

|            |            |              |      |
|------------|------------|--------------|------|
| EF030953.1 | dove       | South Africa | 2005 |
| DQ202263.1 | grouse     | Russia       | 2004 |
| AY734536.1 | pigeon     | Argentina    | 1997 |
| AY471779.1 | pigeon     | UAE          | 1998 |
| AY471756.1 | pigeon     | UK           | 2002 |
| AY471751.1 | pigeon     | UK           | 2002 |
| AY471743.1 | pigeon     | Ireland      | 2001 |
| AY190518.1 | pigeon     | Hungary      | 2002 |
| AY150159.1 | pigeon     | Sweden       | 2000 |
| AY150157.1 | pigeon     | Sweden       | 2000 |
| AY150092.1 | pigeon     | Iraq         | 1978 |
| AF456439.1 | Goose      | China        | 1998 |
| KU377529.1 | turtledove | Italy        | 2002 |
| KX761865.1 | pigeon     | China        | 2011 |
| KR014815.1 | pigeon     | China        | 2014 |
| KT381606.1 | pigeon     | Guangdong    | 2014 |
| KT163263.1 | pigeon     | China        | 2013 |
| KT163262.1 | pigeon     | China        | 2013 |
| KT163261.1 | pigeon     | China        | 2012 |
| KM374060.1 | pigeon     | China        | 2011 |
| KM374058.1 | pigeon     | Anhui        | 2012 |
| KJ525672.1 | pigeon     | China        | 2010 |
| KJ607163.1 | pigeon     | China        | 2004 |
| KJ600779.1 | pigeon     | China        | 2013 |
| KJ600778.1 | pigeon     | China        | 2013 |
| KC915213.1 | pigeon     | Macedonia    | 2011 |
| JX244803.1 | pigeon     | China        | 2008 |
| JX901121.1 | pigeon     | Belgium      | 2007 |
| JX486554.1 | pigeon     | China        | 2011 |
| JX486551.1 | pigeon     | China        | 2005 |
| JN941995.1 | pigeon     | USA (NY)     | 2008 |
| JN942095.1 | pigeon     | USA (OK)     | 1997 |
| JN872188.1 | pigeon     | USA (MN)     | 1989 |
| JN872182.1 | pigeon     | USA (NY)     | 1998 |
| JN872180.1 | pigeon     | USA (TX)     | 2002 |
| JF713701.1 | pigeon     | China        | 2010 |
| HM625835.1 | duck       | China        | 2008 |
| FJ480826.1 | pigeon     | China        | 2006 |
| EF030952.1 | dove       | South Africa | 2005 |
| EF030951.1 | chicken    | South Africa | 2006 |
| EU240580.1 | pigeon     | Slovakia     | 2006 |
| EU240578.1 | pigeon     | Slovakia     | 2006 |
| EU240576.1 | pigeon     | Slovakia     | 2006 |

|            |                     |              |      |
|------------|---------------------|--------------|------|
| EU240575.1 | pigeon              | Slovakia     | 2006 |
| DQ417113.1 | pigeon              | China        | 1996 |
| AY471797.1 | pigeon              | Canada       | 1991 |
| AY471755.1 | pigeon              | UK           | 2002 |
| AY471739.1 | pigeon              | Denmark      | 2001 |
| AY471738.1 | pigeon              | Denmark      | 2000 |
| AY150160.1 | pigeon              | Denmark      | 2001 |
| AY150158.1 | pigeon              | Sweden       | 2000 |
| AY150128.1 | pigeon              | Canada       | 1992 |
| AY150127.1 | pigeon              | Canada       | 1991 |
| AY150124.1 | pigeon              | Denmark      | 1990 |
| AY150116.1 | pigeon              | USA (MN)     | 1987 |
| AY150110.1 | pigeon              | Denmark      | 1987 |
| AY150103.1 | pigeon              | Hungary      | 1984 |
| KX247376.1 | pigeon              | China        | 2015 |
| KT381602.1 | pigeon              | China        | 2013 |
| KT163264.1 | pigeon              | China        | 2012 |
| KM374057.1 | pigeon              | Anhui        | 2012 |
| KJ600777.1 | pigeon              | China        | 2012 |
| JX901318.1 | duck                | USA (PA)     | 2002 |
| KC143163.1 | pigeon              | China        | 1996 |
| JX901120.1 | pigeon              | Belgium      | 2005 |
| HE972209.1 | pigeon              | Luxembourg   | 2006 |
| JX486553.1 | pigeon              | China        | 2011 |
| JQ775522.1 | Eurasian black bird | China        | 2011 |
| JN942098.1 | pigeon              | USA (NC)     | 2000 |
| HM748948.1 | chicken             | China        | 2008 |
| GQ281088.1 | pigeon              | China        | 2007 |
| GQ281086.1 | pigeon              | China        | 2007 |
| GQ281085.1 | pigeon              | China        | 2007 |
| FJ766530.1 | pigeon              | China        | 2007 |
| FJ766527.1 | pigeon              | China        | 2007 |
| FJ766526.1 | pigeon              | China        | 2007 |
| GU551934.1 | carrier-pigeon      | China        | 2008 |
| EU240582.1 | pigeon              | Slovakia     | 2006 |
| AY471794.1 | pigeon              | Finland      | 1992 |
| AY471793.1 | pigeon              | UK           | 1988 |
| AY471786.1 | pigeon              | South Africa | 1998 |
| AY390291.1 | pigeon              | China        | 1996 |
| AY151385.1 | chicken             | Sudan        | 1975 |
| AY150156.1 | pigeon              | Sweden       | 2000 |
| AY150126.1 | pigeon              | Sweden       | 1990 |
| AY150117.1 | pigeon              | Canada       | 1988 |

|            |               |              |      |
|------------|---------------|--------------|------|
| AY175760.1 | pigeon        | South Africa | 1998 |
| KT381604.1 | pigeon        | China        | 2014 |
| KT381603.1 | pigeon        | China        | 2013 |
| KT381601.1 | pigeon        | China        | 2013 |
| KT381592.1 | pigeon        | China        | 2014 |
| KJ607164.1 | pigeon        | China        | 2003 |
| JX901341.1 | pigeon        | USA (PA)     | 2007 |
| KC013040.1 | pigeon        | USA (PA)     | 2007 |
| HG424629.1 | pigeon        | Nigeria      | 2013 |
| HG326604.1 | pigeon        | Nigeria      | 2009 |
| JX244789.1 | pigeon        | China        | 2000 |
| KC143155.1 | pigeon        | China        | 1997 |
| JX518532.1 | Laughing dove | Kenya        | 2012 |
| JX486557.1 | pigeon        | China        | 2012 |
| JQ290284.1 | pigeon        | China        | 2009 |
| JN872173.1 | pigeon        | USA (NY)     | 1984 |
| JN967788.1 | pigeon        | USA (MD)     | 1985 |
| GQ338311.1 | pigeon        | China        | 2005 |
| FJ766528.1 | pigeon        | China        | 2005 |
| FJ410147.1 | pigeon        | USA (MD)     | 1984 |
| FJ410145.1 | pigeon        | USA (NY)     | 1984 |
| FJ480825.1 | pigeon        | China        | 2005 |
| EF520716.1 | pigeon        | USA (NY)     | 1984 |
| DQ296070.1 | pigeon        | Turkey       | 2005 |
| AY471850.1 | pigeon        | Italy        | 1984 |
| AY390289.1 | pigeon        | China        | 2001 |
| AY150162.1 | pigeon        | Hungary      | 2001 |
| AY150122.1 | pigeon        | Canada       | 1990 |
| AY150111.1 | pigeon        | Egypt        | 1987 |
| AY150107.1 | pigeon        | Hungary      | 1986 |
| AF378259.1 | pigeon        | China        | 1995 |
| AF001109.1 | pigeon        | Kuwait       | 1997 |
| AF001108.1 | pigeon        | Iraq         | 1997 |
| KJ544861.1 | Human         | Netherlands  | 2003 |
| KM374056.1 | pigeon        | China        | 2013 |
| KC143162.1 | pigeon        | China        | 1999 |
| KC143158.1 | pigeon        | China        | 2003 |
| HE972212.1 | pigeon        | Luxembourg   | 2007 |
| JN638237.1 | dove          | Italy        | 2010 |
| GQ281087.1 | pigeon        | China        | 2007 |
| FJ766531.1 | pigeon        | China        | 2007 |
| DQ217716.1 | pigeon        | China        | 2003 |
| AY471792.1 | pigeon        | UK           | 1991 |

|            |           |          |      |
|------------|-----------|----------|------|
| AY471790.1 | pigeon    | UK       | 1989 |
| AY471787.1 | swan      | Israel   | 2001 |
| AY390290.1 | pigeon    | China    | 1999 |
| AY150136.1 | duck      | Denmark  | 1993 |
| AY150113.1 | pigeon    | Hungary  | 1987 |
| AY175757.1 | pigeon    | Ireland  | 1996 |
| AY175755.1 | pigeon    | Denmark  | 1995 |
| AJ880277.1 | pigeon    | Italy    | 1982 |
| AB070407.1 | pigeon    | Japan    | 1986 |
| AB070394.1 | chicken   | Japan    | 1985 |
| AB070390.1 | pigeon    | Japan    | 1984 |
| AF001110.1 | fowl      | Lebanon  | 1970 |
| KY569334.1 | pigeon    | Malaysia | 2006 |
| KU377532.1 | turtle    | dove     | 2008 |
| JN872166.1 | dove      | Italy    | 2008 |
| AY471788.1 | pigeon    | Israel   | 2001 |
| HG424628.1 | pigeon    | Nigeria  | 2013 |
| KR082484.1 | pigeon    | Egypt    | 2014 |
| JX901312.1 | pigeon    | USA (PA) | 2001 |
| KC013031.1 | pigeon    | USA (PA) | 2001 |
| HG424627.1 | pigeon    | Nigeria  | 2013 |
| KC143167.1 | pigeon    | China    | 1997 |
| KC143157.1 | pigeon    | China    | 2002 |
| JN872187.1 | pigeon    | USA (IL) | 1993 |
| JN872186.1 | pigeon    | USA (IN) | 1991 |
| JN967786.1 | pigeon    | USA (NJ) | 2000 |
| JF749831.1 | pigeon    | Uruguay  | 2008 |
| EU240574.1 | pigeon    | Slovakia | 2006 |
| DQ198273.1 | pigeon    | China    | 2002 |
| AY471855.1 | pigeon    | UK       | 1984 |
| AY471853.1 | rice bran | UK       | 1984 |
| AY471849.1 | pigeon    | Belgium  | 1984 |
| AY471848.1 | pigeon    | UK       | 1984 |
| AY471833.1 | pigeon    | UK       | 1986 |
| AY471832.1 | pigeon    | UK       | 1988 |
| AY390288.1 | pigeon    | China    | 1997 |
| AY151384.1 | chicken   | Sudan    | 1975 |
| AY150144.1 | pigeon    | Croatia  | 1995 |
| AY150138.1 | pigeon    | Denmark  | 1993 |
| AY150097.1 | pigeon    | Denmark  | 1983 |
| AY150094.1 | pigeon    | Malta    | 1982 |
| AY175738.1 | falcon    | UAE      | 1996 |
| AB070417.1 | pigeon    | Japan    | 1995 |

|            |                |              |         |
|------------|----------------|--------------|---------|
| KC143161.1 | pigeon         | China        | 2005    |
| KC143160.1 | pigeon         | China        | 2005    |
| JN942099.1 | gannet         | USA (PA)     | 2000    |
| FJ865434.1 | pigeon         | China        | 2002    |
| EU296500.1 | pigeon         | Taiwan       | 1984    |
| DQ439886.1 | pigeon         | China        | 2005    |
| DQ439885.1 | pigeon         | China        | 2005    |
| AY471856.1 | pigeon         | China        | 1986    |
| AY471836.1 | pigeon         | UK           | 1989    |
| AY471789.1 | pigeon         | Austria      | 2000    |
| AY390292.1 | pigeon         | South Africa | 1998    |
| AY135749.1 | pigeon         | Germany      | 1994    |
| AY151383.1 | chicken        | Sudan        | 1975    |
| AY150165.1 | turtle dove    | Croatia      | 2002    |
| AY150123.1 | Hyacinth macaw | Germany      | 1990    |
| AY150095.1 | pigeon         | Germany      | 1983    |
| AY325798.1 | pigeon         | China        |         |
| AF109885.1 | pigeon         | UK           | 1984    |
| AB070416.1 | pigeon         | Japan        | 1993    |
| AB070413.1 | pigeon         | Japan        | 1991    |
| AB070412.1 | pigeon         | Japan        | 1991    |
| AB070409.1 | pigeon         | Japan        | 1988    |
| KM588202.1 | Eagle          | Israel       | 2014    |
| KC143154.1 | pigeon         | China        | 1998    |
| HM627541.1 | pigeon         | Poland       | 2010    |
| AY471854.1 | pigeon         | UK           | 1986    |
| AY471847.1 | pigeon         | UK           | 1984    |
| AY135748.1 | Saker          | UAE          | 1990    |
| AY150108.1 | pigeon         | Germany      | 1987    |
| AY150101.1 | chicken        | Germany      | 1984    |
| AY150098.1 | pigeon         | Hungary      | 1983    |
| AY150096.1 | pigeon         | Germany      | 1983    |
| AY175768.1 | pigeon         | UK           | 1989    |
| AF358785.1 | chicken        | Singapore    | 1998    |
| AB070392.1 | pigeon         | Japan        | 1984    |
| AB070388.1 | chicken        | Japan        | 1981    |
| KU377534.1 | pigeon         | Italy        | 2011    |
| KC143150.1 | chicken        | China        | 2006    |
| DQ217671.1 | chicken        | China        | 2006    |
| AY471827.1 | pigeon         | UK           | 1989    |
| AY471812.1 | pigeon         | UK           | Unknown |
| AY150121.1 | dove           | Italy        | 1989    |
| AY150102.1 | pigeon         | Croatia      | 1984    |

|            |         |            |         |
|------------|---------|------------|---------|
| AF402131.1 | chicken | Bulgaria   | 1982    |
| AF400615.1 | pigeon  | China      | 1997    |
| Y18728.1   | pigeon  | Russia     | 1974    |
| AB070391.1 | pigeon  | Japan      | 1984    |
| AB070389.1 | chicken | Japan      | 1984    |
| KU885390.1 | pigeon  | India      | 2015    |
| KT962979.1 | pigeon  | Russia     | 2010    |
| KJ920204.1 | pigeon  | Russia     | 2011    |
| KU862297.1 | pigeon  | Pakistan   | 2014    |
| KT965727.1 | pigeon  | Kazakhstan | 2014    |
| KT343665.1 | pigeon  | Iran       | 2012    |
| JF824047.1 | pigeon  | Russia     | 2007    |
| EF543764.1 | pigeon  | Korea      | 1999    |
| AY630422.1 | pigeon  | Korea      | 1997    |
| AY471835.1 | pigeon  | UK         | 1994    |
| AY471829.1 | pigeon  | Ireland    | 1990    |
| AY471828.1 | pigeon  | UK         | 1990    |
| AY471811.1 | pigeon  | UK         | Unknown |
| AY471807.1 | pigeon  | Ireland    | 1992    |
| AY252120.1 | pigeon  | Hungary    | 1990    |
| AY150147.1 | pigeon  | Italy      | 1996    |
| AF402116.1 | chicken | Bulgaria   | 1974    |
| KY510683.1 | owl     | Iceland    | 2016    |
| KX236101.2 | pigeon  | Pakistan   | 2015    |
| KT343676.1 | pigeon  | Iran       | 2013    |
| KT343673.1 | pigeon  | Iran       | 2013    |
| KT343672.1 | pigeon  | Iran       | 2013    |
| KT343670.1 | pigeon  | Iran       | 2012    |
| KJ914672.1 | pigeon  | Ukraine    | 2011    |
| KC143148.1 | chicken | China      | 2003    |
| JF824030.1 | pigeon  | Russia     | 2005    |
| JN967787.1 | pigeon  | USA (IL)   | 1987    |
| FJ766529.1 | chicken | China      | 1997    |
| DQ217668.1 | pigeon  | China      | 2003    |
| AY630414.1 | pigeon  | Korea      | 1989    |
| AY471826.1 | pigeon  | UK         | 1989    |
| AY471824.1 | pigeon  | UK         | 1986    |
| AY471822.1 | pigeon  | UK         | 1988    |
| AY471820.1 | pigeon  | UK         | 1988    |
| AY471806.1 | chicken | Ireland    | 1991    |
| AY471748.1 | pigeon  | UK         | 1986    |
| AY150125.1 | pigeon  | Italy      | 1990    |
| AY175767.1 | pigeon  | UK         | 1988    |



|            |              |            |      |
|------------|--------------|------------|------|
| AF234030.1 | pigeon       | Taiwan     | 1999 |
| KT343663.1 | pigeon       | Iran       | 2012 |
| KF944359.1 | pigeon       | Israel     | 2013 |
| KX580988.1 | pigeon       | Egypt      | 2015 |
| KX580986.1 | pigeon       | Egypt      | 2014 |
| KT343675.1 | pigeon       | Iran       | 2013 |
| KT343674.1 | pigeon       | Iran       | 2013 |
| KT343671.1 | pigeon       | Iran       | 2012 |
| KT343664.1 | pigeon       | Iran       | 2012 |
| KT343662.1 | pigeon       | Iran       | 2012 |
| AB853928.2 | chicken      | Japan      | 1987 |
| KC143147.1 | chicken      | China      | 2003 |
| JF824045.1 | pigeon       | Russia     | 2008 |
| JF824044.1 | pigeon       | Russia     | 2007 |
| AB465606.1 | chicken      | Japan      | 1985 |
| DQ296066.1 | pigeon       | Turkey     | 2005 |
| DQ217666.1 | pigeon       | China      | 2003 |
| AY630413.1 | pigeon       | Korea      | 1988 |
| AY471817.1 | dove         | UK         | 1996 |
| AY175673.1 | pigeon       | China      | 1989 |
| AF458016.1 | China        | chicken    | 1986 |
| AF458015.1 | China        | chicken    | 1997 |
| AB070397.1 | chicken      | Japan      | 1985 |
| AY150120.1 | pigeon       | Hungary    | 1989 |
| AY150114.1 | pigeon       | Hungary    | 1987 |
| AY471846.1 | dove         | Italy      | 2000 |
| AY471837.1 | pigeon       | Italy      | 1994 |
| AY471823.1 | pigeon       | UK         | 1988 |
| AY471816.1 | pigeon       | UK         | 1993 |
| AY150142.1 | pigeon       | Italy      | 1994 |
| KU377537.1 | pigeon       | Italy      | 2014 |
| KX580976.1 | pigeon       | Egypt      | 2013 |
| KT343669.1 | pigeon       | Iran       | 2012 |
| KT343668.1 | pigeon       | Iran       | 2012 |
| KT343666.1 | pigeon       | Iran       | 2012 |
| JF824052.1 | pigeon       | Russia     | 2008 |
| AY135742.1 | pigeon       | Bulgaria   | 1995 |
| AF458018.1 | chicken      | China      | 1997 |
| AF458017.1 | chicken      | China      | 1998 |
| AF001131.1 | fowl         | Sweden     | 1995 |
| AY150118.1 | pigeon       | Hungary    | 1988 |
| KT965728.1 | pigeon       | Kazakhstan | 2014 |
| KC853020.1 | crested ibis | China      | 2010 |

|            |                  |             |         |
|------------|------------------|-------------|---------|
| HQ839733.1 | chicken          | Sweden      | 1995    |
| AY630416.1 | pigeon           | Korea       | 1990    |
| AY471825.1 | pigeon           | UK          | 1990    |
| AY471819.1 | pigeon           | UK          | 1990    |
| AY150146.1 | pheasant         | Italy       | 1995    |
| AY175769.1 | pigeon           | UK          | 1990    |
| AY175758.1 | pheasant         | Italy       | 1995    |
| AY175655.1 | duck             | Tanzania    | 1995    |
| AF525384.1 | pigeon           | Germany     | 1981    |
| AF402117.1 | chicken          | Bulgaria    | 1974    |
| AF109878.1 | fowl             | Denmark     | 1995    |
| AF001129.1 | fowl             | Denmark     | 1995    |
| AF001112.1 | fowl             | Hungary     | 1982    |
| KT343678.1 | pigeon           | Iran        | 2013    |
| KU377528.1 | turtle dove      | Italy       | 2000    |
| KU644586.1 | pigeon           | Pakistan    | 2014    |
| KU373026.1 | ostrich          | China       | 2006    |
| KU885949.1 | pigeon           | Pakistan    | 2014    |
| KT343677.1 | pigeon           | Iran        | 2013    |
| JX855038.1 | ostrich          | China       | 2006    |
| KC143152.1 | chicken          | China       | 1997    |
| EF589137.1 | pigeon           | China       | 2007    |
| AY734535.1 | pigeon           | Argentina   | 1999    |
| AY471841.1 | pigeon           | Italy       | 1996    |
| AY471838.1 | pigeon           | Italy       | 1998    |
| AY390296.1 | chicken          | China       | 2003    |
| AY150148.1 | pigeon           | Italy       | 1996    |
| AY175667.1 | Peregrine Falcon | UAE         | 1992    |
| JX855037.1 | crested ibis     | China       | 2010    |
| KC143149.1 | chicken          | China       | 2003    |
| DQ217670.1 | chicken          | China       | 2003    |
| AY471840.1 | pigeon           | Italy       | 1997    |
| AY150145.1 | pigeon           | Italy       | 1995    |
| AF458020.1 | chicken          | China       | 1991    |
| AF402135.1 | chicken          | China       | 1986    |
| AF109879.1 | chicken          | Sweden      | 1995    |
| AF001132.1 | fowl             | Switzerland | Unknown |
| AY471844.1 | pigeon           | Austria     | 1996    |
| KX236100.2 | pigeon           | Pakistan    | 2015    |
| KU862298.1 | pigeon           | Pakistan    | 2015    |
| KT343667.1 | pigeon           | Iran        | 2012    |
| AF458019.1 | chicken          | China       | 1997    |
| AF001133.1 | fowl             | Austria     | 1996    |

|            |             |          |      |
|------------|-------------|----------|------|
| AF378258.1 | pigeon      | China    | 1995 |
| DQ296068.1 | pigeon      | Turkey   | 2005 |
| AY471845.1 | pigeon      | Austria  | 1996 |
| AF234034.1 | pigeon      | Taiwan   | 1999 |
| FJ969394.1 | chicken     | Egypt    | 2006 |
| KJ525712.1 | chicken     | Sudan    | 2011 |
| AY288997   | chicken     | Kenya    | 1990 |
| HM776583   | pigeon      | China    | 2008 |
| KJ525675   | pigeon      | China    | 2013 |
| KU377533   | turtle dove | Italy    | 2010 |
| KU377535   | turtle dove | Italy    | 2012 |
| KU377536   | turtle dove | Italy    | 2012 |
| KU885390   | pigeon      | India    | 2015 |
| KY510683.1 | scopowl     | Israel   | 2016 |
| JN872162   | rosella     | Belgium  | 2008 |
| JX901120   | pigeon      | Belgium  | 2005 |
| KJ736742   | pigeon      | Germany  | 1998 |
| AY288995   | dove        | Italy    | 2000 |
| GQ429292   | pigeon      | Ireland  | 1996 |
| GQ429293   | dove        | Italy    | 2000 |
| JN872153   | chicken     | USA (CA) | 1971 |
| EU477188   | dove        | USA (TX) | 2004 |
| EU477189   | pigeon      | USA (RI) | 2000 |
| EU477190   | pigeon      | USA (TX) | 2004 |
| EU477191   | ECDO        | USA (TX) | 2005 |
| EU477192   | ECDO        | USA (TX) | 2005 |
| EU477195   | ECDO        | USA (TX) | 2006 |
| JN872160   | pigeon      | USA (MN) | 2007 |
| JN872167   | dove        | USA (FL) | 2006 |
| JN872170   | pigeon      | USA (TX) | 2010 |
| JN872172   | raptor      | USA (MN) | 2009 |
| JN872174   | environment | USA (NJ) | 2010 |
| JN872175   | pigeon      | USA (MN) | 2009 |
| JN872176   | pheasant    | USA (MA) | 2005 |
| JN872177   | chicken     | USA (MA) | 2004 |
| JN872178   | turkey      | USA (LA) | 2004 |
| JN872179   | pigeon      | USA (NV) | 2003 |
| JN872190   | pigeon      | USA (SD) | 2007 |
| JN941996   | pigeon      | USA (PA) | 2008 |
| JN941998   | pigeon      | USA (PA) | 2008 |
| JN941999   | pigeon      | USA (MN) | 2008 |
| JN942000   | dove        | USA (FL) | 2008 |
| JN942100   | chukar      | USA (NJ) | 2000 |

|          |         |          |      |
|----------|---------|----------|------|
| JX901304 | pigeon  | USA (PA) | 2003 |
| JX901305 | pigeon  | USA (PA) | 2003 |
| JX901313 | pigeon  | USA (PA) | 2001 |
| JX901314 | dove    | USA (PA) | 2001 |
| JX901317 | pigeon  | USA (PA) | 2002 |
| JX901319 | pigeon  | USA (PA) | 2005 |
| JX901320 | pigeon  | USA (PA) | 2005 |
| JX901321 | chicken | USA (PA) | 2005 |
| JX901323 | pigeon  | USA (PA) | 2006 |
| JX901324 | pigeon  | USA (PA) | 2006 |
| JX901325 | pigeon  | USA (NY) | 2006 |
| JX901326 | pigeon  | USA (NJ) | 2006 |
| JX901327 | pigeon  | USA (PA) | 2006 |
| JX901328 | pigeon  | USA (NJ) | 2006 |
| JX901329 | pigeon  | USA (PA) | 2007 |
| JX901330 | pigeon  | USA (PA) | 2007 |
| JX901332 | pigeon  | USA (MO) | 2007 |
| JX901333 | pigeon  | USA (PA) | 2007 |
| JX901334 | pigeon  | USA (PA) | 2007 |
| JX901335 | pigeon  | USA (PA) | 2007 |
| JX901336 | pigeon  | USA (NC) | 2007 |
| JX901337 | pigeon  | USA (CT) | 2007 |
| JX901338 | pigeon  | USA (OH) | 2007 |
| JX901339 | pigeon  | USA (NJ) | 2007 |
| JX901340 | pigeon  | USA (PA) | 2007 |
| JX901342 | pigeon  | USA (MN) | 2007 |
| JX901344 | pigeon  | USA (ME) | 2007 |
| JX901346 | pigeon  | USA (PA) | 2007 |
| JX901347 | pigeon  | USA (NY) | 2007 |
| JX901348 | pigeon  | USA (PA) | 2007 |
| JX901349 | pigeon  | USA (MD) | 2007 |
| JX901350 | pigeon  | USA (PA) | 2007 |
| JX901351 | pigeon  | USA (NJ) | 2007 |
| JX901352 | pigeon  | USA (PA) | 2007 |
| JX901353 | pigeon  | USA (PA) | 2007 |
| JX901354 | pigeon  | USA (PA) | 2007 |
| JX901355 | pigeon  | USA (PA) | 2007 |
| JX901356 | pigeon  | USA (PA) | 2007 |
| JX901357 | pigeon  | USA (PA) | 2007 |
| JX901358 | pigeon  | USA (PA) | 2008 |
| JX901359 | pigeon  | USA (PA) | 2008 |
| JX901360 | pigeon  | USA (PA) | 2008 |
| JX901361 | pigeon  | USA (PA) | 2008 |

|          |               |           |      |
|----------|---------------|-----------|------|
| JX901362 | pigeon        | USA (PA)  | 2008 |
| JX901363 | pigeon        | USA (PA)  | 2008 |
| JX901364 | pigeon        | USA (PA)  | 2008 |
| JX901365 | pigeon        | USA (PA)  | 2008 |
| JX901366 | pigeon        | USA (PA)  | 2008 |
| JX901367 | pigeon        | USA (PA)  | 2008 |
| JX901368 | pigeon        | USA (PA)  | 2008 |
| JX901369 | pigeon        | USA (NJ)  | 2008 |
| JX901372 | chicken       | USA (PA)  | 2009 |
| JX901373 | pigeon        | USA (PA)  | 2009 |
| JX901374 | pigeon        | USA (OH)  | 2009 |
| JX901375 | pigeon        | USA (PA)  | 2009 |
| JX901376 | pigeon        | USA (PA)  | 2009 |
| JX901377 | pigeon        | USA (PA)  | 2009 |
| KP780870 | ROPI          | USA (MD)  | 2013 |
| KP780871 | ROPI          | USA (PA)  | 2013 |
| KP780872 | ROPI          | USA (PA)  | 2013 |
| KP780873 | ROPI          | USA (PA)  | 2013 |
| KP780874 | ROPI          | USA (PA)  | 2013 |
| KP780875 | ROPI          | USA (MI)  | 2013 |
| KP780876 | ROPI          | USA (MI)  | 2013 |
| KU059751 | pigeon        | USA (RI)  | 2000 |
| KU059752 | ECDO          | USA (TX)  | 2004 |
| JN872183 | pigeon        | USA (MD)  | 1998 |
| AF109885 | domestic fowl | UK        | 1984 |
| AJ880277 | pigeon        | Italy     | 1982 |
| AY734535 | pigeon        | Argentina | 1999 |
| EF520716 | pigeon        | USA (NY)  | 1984 |
| FJ410145 | pigeon        | USA (NY)  | 1984 |
| FJ410147 | pigeon        | USA (MD)  | 1984 |
| FJ865434 | pigeon        | China     | 2002 |
| JN872173 | pigeon        | USA (NY)  | 2007 |
| JN967787 | pigeon        | USA (IL)  | 1987 |
| JN967788 | pigeon        | USA (MD)  | 1985 |
| KU377528 | turtle        | dove      | 2000 |
| KU377531 | pigeon        | Italy     | 2006 |
| AB465606 | chicken       | Japan     | 1985 |
| AB853928 | chicken       | Japan     | 1987 |
| AF458015 | chicken       | China     | 1997 |
| AF458016 | chicken       | China     | 1986 |
| AF458017 | chicken       | China     | 1998 |
| AF458018 | chicken       | China     | 1997 |
| EF589137 | pigeon        | China     | 2007 |

|            |              |             |      |
|------------|--------------|-------------|------|
| HQ839733   | chicken      | Sweden      | 1995 |
| KC853020   | crested ibis | China       | 2010 |
| KU373026   | ostrich      | China       | 2006 |
| KY042125   | chicken      | Bulgaria    | 1992 |
| AB853926   | chicken      | Japan       | 1969 |
| Z12111     | chicken      | UK          | 1966 |
| AF458019   | chicken      | China       | 1997 |
| AF458020   | chicken      | China       | 1991 |
| AF458021   | chicken      | China       | 1994 |
| GQ507801   | chicken      | South Korea | 1989 |
| KY042142   | quail        | Korea       | 1988 |
| KY042143   | chicken      | Korea       | 1993 |
| AY325798   | pigeon       | China       | 2003 |
| DQ417113   | pigeon       | China       | 1996 |
| FJ480825   | pigeon       | China       | 2005 |
| FJ480826   | pigeon       | China       | 2006 |
| FJ766528   | pigeon       | China       | 2005 |
| GQ338311   | pigeon       | China       | 2005 |
| JQ290284   | pigeon       | China       | 2009 |
| JX244794   | pigeon       | China       | 2008 |
| JX244801   | pigeon       | China       | 2008 |
| JX244803   | pigeon       | China       | 2008 |
| JX244805   | pigeon       | China       | 2008 |
| KJ607163   | pigeon       | China       | 2004 |
| KJ607164   | pigeon       | China       | 2003 |
| KJ808820   | pigeon       | China       | 2012 |
| KT381596   | pigeon       | China       | 2013 |
| KX710209.1 | pigeon       | India       | 2015 |
| AF358785   | pigeon       | China       | 1998 |
| JN872180   | water fowl   | USA (TX)    | 2002 |
| JN872182   | pigeon       | USA (NY)    | 1998 |
| JN942095   | pigeon       | USA (OK)    | 1997 |
| JN942098   | pigeon       | USA (NC)    | 2000 |
| JN942099   | gannet       | USA (PA)    | 2000 |
| JN967786   | pigeon       | USA (NJ)    | 2000 |
| JX901312   | pigeon       | USA (PA)    | 2001 |
| JX901318   | duck         | USA (PA)    | 2002 |
| JX901341   | pigeon       | USA (PA)    | 2007 |
| JN872187   | pigeon       | USA (IL)    | 1993 |
| JN872185   | pigeon       | USA (NY)    | 1984 |
| JN872186   | pigeon       | USA (IN)    | 1991 |
| JN872188   | pigeon       | USA (MN)    | 1989 |
| FJ410148   | pigeon       | USA (TX)    | 1998 |

|          |                     |            |      |
|----------|---------------------|------------|------|
| JN872184 | pigeon              | USA (WY)   | 1997 |
| JN942022 | chicken             | USA (TX)   | 2004 |
| JF824013 | pigeon              | Russia     | 2009 |
| JF824032 | pigeon              | Russia     | 2005 |
| KJ914671 | pigeon              | Ukraine    | 2011 |
| KJ914672 | pigeon              | Ukraine    | 2011 |
| KJ920204 | pigeon              | Russia     | 2011 |
| KT962979 | pigeon              | Russia     | 2010 |
| KT965727 | pigeon              | Kazakhstan | 2014 |
| KT965728 | pigeon              | Kazakhstan | 2014 |
| KT965729 | starling            | Kazakhstan | 2014 |
| KT965730 | northern pintail    | Kazakhstan | 2014 |
| KT965731 | Long-legged buzzard | Kazakhstan | 2014 |
| KT965732 | pigeon              | Kazakhstan | 2014 |
| KX352835 | mallard             | Russia     | 2009 |
| KY042127 | pigeon              | Ukraine    | 2013 |
| KY042128 | pigeon              | Ukraine    | 2007 |
| KY042129 | pigeon              | Egypt      | 2015 |
| KY042130 | pigeon              | Egypt      | 2015 |
| KY042131 | pigeon              | Egypt      | 2015 |
| KY042132 | pigeon              | Egypt      | 2015 |
| KY042133 | pigeon              | Egypt      | 2015 |
| KY042134 | pigeon              | Egypt      | 2015 |
| KY042136 | pigeon              | Pakistan   | 2015 |
| KY042137 | pigeon              | Pakistan   | 2015 |
| KY042138 | pigeon              | Pakistan   | 2015 |
| KY042139 | pigeon              | Pakistan   | 2016 |
| JQ039385 | dove                | Nigeria    | 2007 |
| HG326601 | pigeon              | Nigeria    | 2007 |
| HG326602 | pigeon              | Nigeria    | 2007 |
| HG326603 | pigeon              | Nigeria    | 2007 |
| HG326604 | pigeon              | Nigeria    | 2009 |
| JX518532 | laughing dove       | Kenya      | 2012 |
| KF944359 | pigeon              | Israel     | 2013 |
| HG424627 | pigeon              | Nigeria    | 2013 |
| JQ039387 | pigeon              | Nigeria    | 2008 |
| JQ039391 | pigeon              | Nigeria    | 2007 |
| AY734536 | pigeon              | Argentina  | 1997 |
| HG424625 | pigeon              | Nigeria    | 2013 |
| JN638234 | dove                | Italy      | 2011 |
| JN638235 | dove                | Italy      | 2011 |
| JN638236 | dove                | Italy      | 2010 |
| AY288996 | pigeon              | Italy      | 2000 |

|          |                          |           |      |
|----------|--------------------------|-----------|------|
| FJ766527 | pigeon                   | China     | 2007 |
| GQ281085 | pigeon                   | China     | 2007 |
| GQ281086 | pigeon                   | China     | 2007 |
| GQ281087 | pigeon                   | China     | 2007 |
| GQ281088 | pigeon                   | China     | 2007 |
| GU551934 | carrier pigeon           | China     | 2008 |
| HE972209 | pigeon                   | Luxemburg | 2006 |
| HE972212 | pigeon                   | Luxemburg | 2007 |
| HM063423 | white breasted water hen | China     | 2005 |
| HM063425 | wild pigeon              | China     | 2003 |
| HM625835 | duck                     | China     | 2008 |
| HM748948 | chicken                  | China     | 2008 |
| JF713701 | pigeon                   | China     | 2010 |
| JN872166 | dove                     | Italy     | 2008 |
| JN941995 | pigeon                   | USA (NY)  | 2008 |
| JN941997 | pigeon                   | USA (FL)  | 2008 |
| JN986839 | pigeon                   | Ireland   | 2004 |
| JQ268609 | pigeon                   | China     | 2011 |
| JX094510 | pigeon                   | China     | 2012 |
| JX244789 | pigeon                   | China     | 2000 |
| JX244798 | pigeon                   | China     | 2008 |
| JX244799 | pigeon                   | China     | 2008 |
| JX244800 | pigeon                   | China     | 2008 |
| JX486550 | pigeon                   | China     | 2011 |
| JX486551 | pigeon                   | China     | 2010 |
| JX486553 | pigeon                   | China     | 2011 |
| JX486554 | pigeon                   | China     | 2011 |
| JX486555 | pigeon                   | China     | 2011 |
| JX486557 | pigeon                   | China     | 2012 |
| JX901109 | pigeon                   | Belgium   | 1998 |
| JX901110 | pigeon                   | Belgium   | 1998 |
| JX901111 | pigeon                   | Belgium   | 1998 |
| JX901119 | pigeon                   | Belgium   | 2005 |
| JX901121 | pigeon                   | Belgium   | 2007 |
| KJ525672 | pigeon                   | China     | 2010 |
| KJ525673 | pigeon                   | China     | 2011 |
| KJ525674 | pigeon                   | China     | 2013 |
| KJ600777 | pigeon                   | China     | 2012 |
| KR014815 | pigeon                   | China     | 2014 |
| KT381595 | pigeon                   | China     | 2014 |
| KT381606 | pigeon                   | China     | 2014 |
| KU377529 | turtledove               | Italy     | 2002 |
| KU377530 | turtledove               | Italy     | 2004 |



|            |            |          |      |
|------------|------------|----------|------|
| KU377532   | turtledove | Italy    | 2008 |
| KU377534   | pigeon     | Italy    | 2011 |
| KU377537   | pigeon     | Italy    | 2014 |
| KX247376   | pigeon     | China    | 2015 |
| KX761865   | pigeon     | China    | 2011 |
| KT163264   | pigeon     | China    | 2012 |
| KY042126   | chicken    | Bulgaria | 1982 |
| KM374059   | pigeon     | China    | 2013 |
| JQ979176   | pigeon     | China    | 2011 |
| JQ993431   | pigeon     | China    | 2011 |
| JX486552   | pigeon     | China    | 2011 |
| JX901122   | pigeon     | Belgium  | 2011 |
| JX901123   | pigeon     | Belgium  | 2011 |
| JX901124   | pigeon     | Belgium  | 2011 |
| KJ607165   | pigeon     | China    | 2013 |
| KJ607166   | pigeon     | China    | 2013 |
| KJ782376   | pigeon     | China    | 2011 |
| KJ808819   | pigeon     | China    | 2013 |
| KM374056   | pigeon     | China    | 2013 |
| KM374057   | pigeon     | China    | 2012 |
| KM374058   | pigeon     | China    | 2012 |
| KM374060   | pigeon     | China    | 2011 |
| KM374061   | pigeon     | China    | 2012 |
| KP861633   | pigeon     | China    | 2012 |
| KT381592   | pigeon     | China    | 2014 |
| KT381601   | pigeon     | China    | 2013 |
| KT381602   | pigeon     | China    | 2013 |
| KT381603   | pigeon     | China    | 2013 |
| KT381604   | pigeon     | China    | 2014 |
| KU522142   | pigeon     | Egypt    | 2014 |
| KU527559   | pigeon     | China    | 2015 |
| KU527560   | pigeon     | China    | 2015 |
| KT163261   | pigeon     | China    | 2012 |
| KT163262   | pigeon     | China    | 2013 |
| KT163263   | pigeon     | China    | 2013 |
| KX710210.1 | pigeon     | India    | 2015 |
| KF828884.1 | pigeon     | China    | 2013 |
| KC205475   | chicken    | Ethiopia | 2011 |
| KC205476   | chicken    | Ethiopia | 2011 |
| KC205477   | chicken    | Ethiopia | 2011 |
| KC205478   | chicken    | Ethiopia | 2011 |
| KC205479   | chicken    | Ethiopia | 2011 |
| KJ958913   | chicken    | Ethiopia | 2012 |

|          |         |          |      |
|----------|---------|----------|------|
| KJ958914 | chicken | Ethiopia | 2012 |
| KU862297 | pigeon  | Pakistan | 2014 |
| KU862298 | pigeon  | Pakistan | 2015 |
| KU862299 | pigeon  | Pakistan | 2015 |
| KU885949 | pigeon  | Pakistan | 2014 |
| KX236100 | pigeon  | Pakistan | 2015 |
| KX236101 | pigeon  | Pakistan | 2015 |
| KY042135 | pigeon  | Pakistan | 2015 |
| KY042140 | pigeon  | Pakistan | 2016 |
| KY042141 | pigeon  | Pakistan | 2016 |

\*UK-United Kingdom

\*UAE- United Arab Emirates
