# Supplementary material for: Whole-genome sequencing of genotype VI Newcastle disease viruses from formalin-fixed paraffin-embedded tissues from wild pigeons reveals continuous evolution and previously unrecognized genetic diversity in the U.S.
Source: Springer Nature journal article supplement (doi:10.1186/s12985-017-0914-2), 2018-01-12
Supplement: MOESM2 [file 15361980]

**Table S4** Comparison of next-generation sequencing results to immunohistochemistry results from 48 Eurasian Collared Doves and Rock Pigeons formalin-fixed paraffin-embedded samples collected in the U.S. between 2010 and 2016.

| Type of tissue | Number of samples processed for NGS | IHC positive ( <i>n</i> = 29) |               | IHC negative ( <i>n</i> = 19) |                 | Total NGS +<br>23 | Total NGS -<br>25 |
|----------------|-------------------------------------|-------------------------------|---------------|-------------------------------|-----------------|-------------------|-------------------|
|                |                                     | NGS +                         | NGS -         | NGS +                         | NGS -           |                   |                   |
| Kidney         | 16                                  | 14                            | 1             | 0                             | 1               | 14                | 2                 |
| Liver          | 17                                  | 3                             | 2             | 0                             | 12              | 3                 | 14                |
| Spleen         | 15                                  | 6                             | 3             | 0                             | 6               | 6                 | 9                 |
| Total          | 48                                  | 23/29<br>(79%)                | 6/29<br>(21%) | 0/19<br>(0%)                  | 19/19<br>(100%) | 23/48<br>(48%)    | 25/48<br>(52%)    |
